# Supplementary material for: Encapsulating and decontaminating of sarin by heptakis(2,3,6-tri-O-methyl)-β-cyclodextrin: MD simulations and QM calculations
Source: Royal Society of Chemistry journal article supplement (doi:10.1039/d0me00173b), 2021-01-01
Supplement: d0me00173b1.pdf [file d0me00173b1.pdf]

## Supporting Information

### **Encapsulating and Decontaminating of Sarin by Heptakis(2,3,6-tri-O-Methyl)- $\beta$ -Cyclodextrin: MD Simulations and QM Calculations**

Fatemeh Mahmoudi, Mehdi Shahraki\*

Department of Chemistry, Faculty of Science, University of Sistan and Baluchestan, Zahedan,

Iran, P. O. Box 98135-674, E-mail: [mehdishahraki@chem.usb.ac.ir](mailto:mehdishahraki@chem.usb.ac.ir)

**Number of pages: 23**

**Number of figures: 3**

**Number of tables: 3**

## Table of Contents

### List of Figures

|                                                                                 |   |
|---------------------------------------------------------------------------------|---|
| Figure S1. Complexation energies of the M- $\beta$ -CD@sarin complex.....       | 3 |
| Figure S2. Representation of the superposition of 100 frames extracted .....    | 3 |
| Figure S3. Plots of the potential energy, kinetic energy, non-bond energy. .... | 4 |

### List of Tables

|                                                                                                           |   |
|-----------------------------------------------------------------------------------------------------------|---|
| Table S1. Donor-acceptor interactions and stabilization energies, $E^{(2)}$ .....                         | 5 |
| Table S2. Topological parameters of the M- $\beta$ -CD@sarin complex .....                                | 6 |
| Table S3. Contributions to total energy calculated for the interaction energy.....                        | 6 |
| <b>XYZ coordinates</b> of the optimized geometry of sarin, M- $\beta$ -CD, and M- $\beta$ -CD@sarin ..... | 8 |

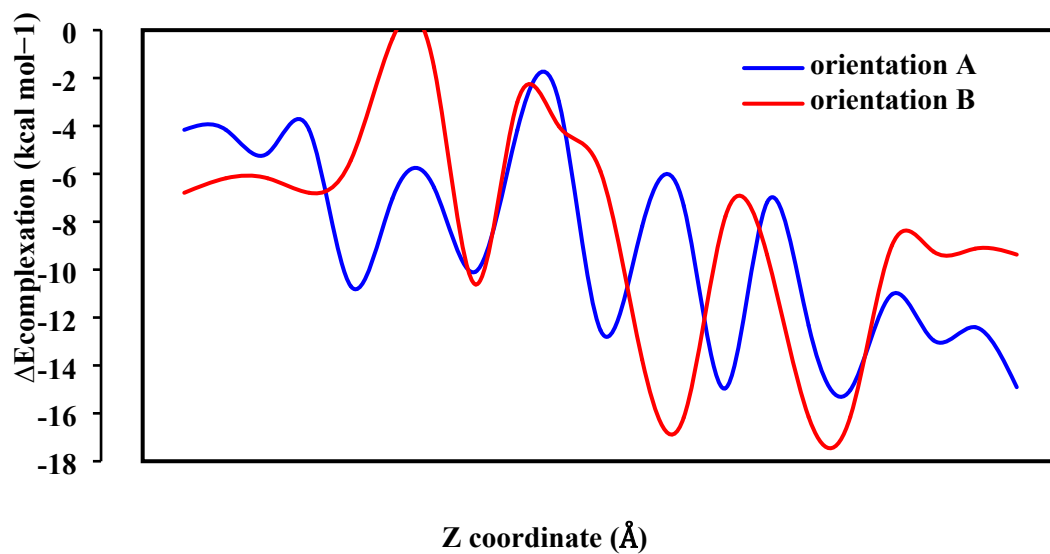

**Figure S1.** Complexation energies of the M- $\beta$ -CD@sarin complex at different distances of Z-axis calculated by PM6 method.

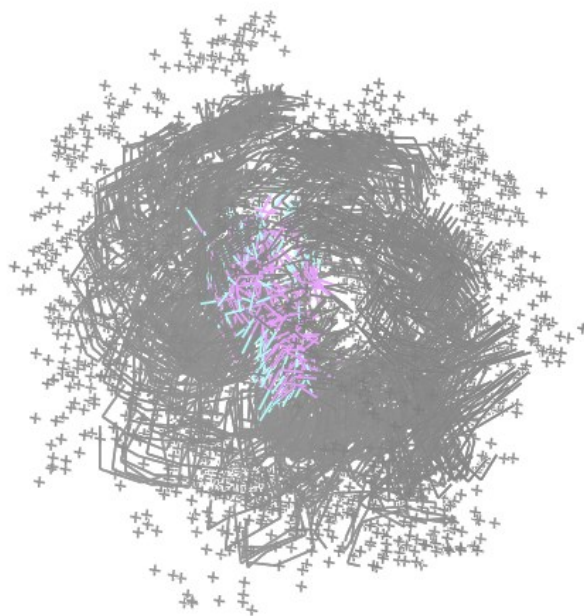

**Figure S2.** Representation of the superposition of 100 frames extracted from annealing dynamics with NVT ensemble for the M- $\beta$ -CD@sarin complex (for visual clarity, the frames are shown without oxygens, hydrogens, and lattice).

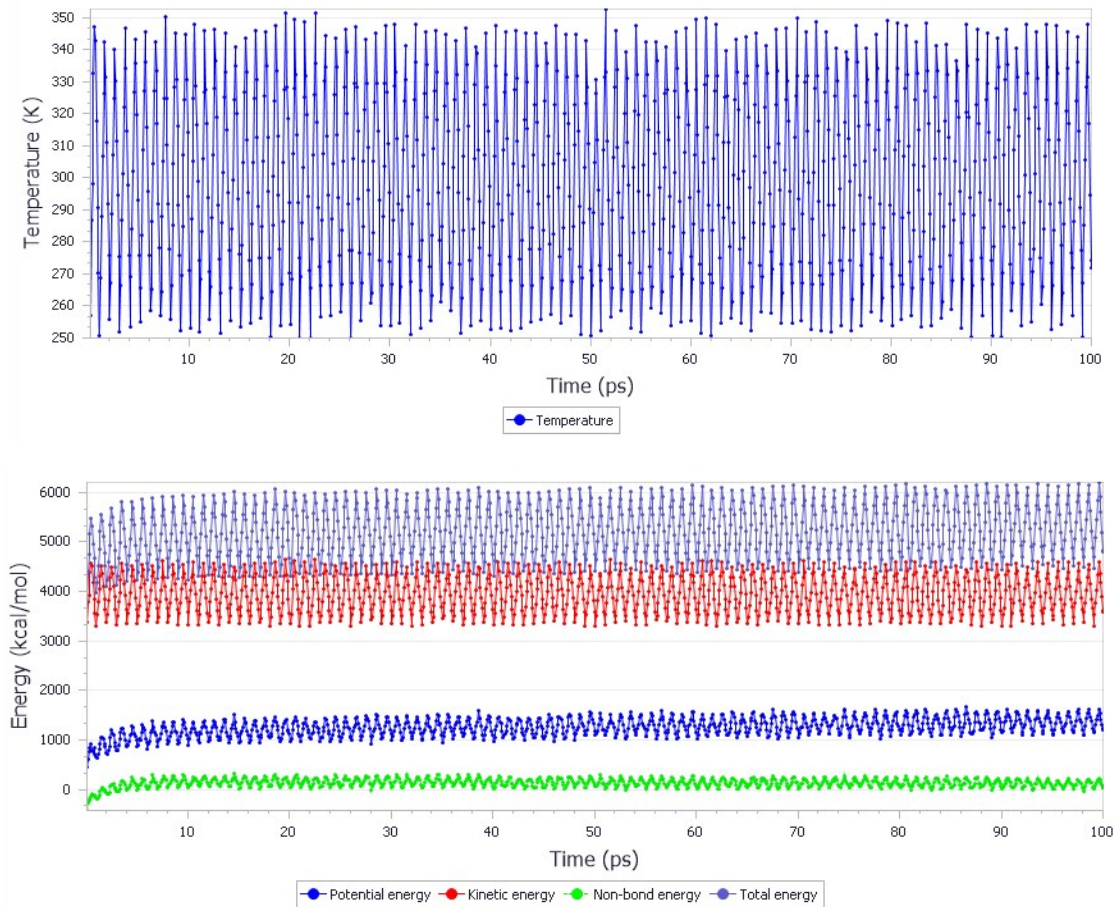

**Figure S3.** Plots of the potential energy, kinetic energy, non-bond energy, total energy, and temperature of the M- $\beta$ -CD@sarin complex in an annealing simulation at NVT ensemble as a function of time.

**Table S1.** Donor-acceptor interactions and stabilization energies,  $E^{(2)}$  (kcal mol<sup>-1</sup>), of the M- $\beta$ -CD@sarin complex calculated by M06-2X/6-31G(d,p) method

| Donor                | Acceptor                 | $E^{(2)}$ |
|----------------------|--------------------------|-----------|
| M- $\beta$ -CD donor | sarin acceptor           |           |
| LP (1) O2            | $\sigma^*$ (1) C216-H221 | 0.48      |
| LP (2) O2            | $\sigma^*$ (1) C216-H221 | 0.53      |
| LP (1) O15           | $\sigma^*$ (1) C218-H226 | 1.52      |
| LP (2) O15           | $\sigma^*$ (1) C218-H226 | 0.80      |
| LP (1) O17           | $\sigma^*$ (1) C218-H226 | 1.37      |
| LP (2) O17           | $\sigma^*$ (1) C218-H226 | 1.54      |
| LP (1) O25           | $\sigma^*$ (1) C217-H223 | 1.50      |
| LP (2) O25           | $\sigma^*$ (1) C217-H223 | 0.15      |
| LP (1) O30           | $\sigma^*$ (1) C216-H220 | 1.31      |
| LP (2) O30           | $\sigma^*$ (1) C216-H220 | 0.22      |
| LP (1) O35           | $\sigma^*$ (1) C216-H221 | 0.44      |
| LP (2) O35           | $\sigma^*$ (1) C216-H221 | 0.17      |
| sarin donor          | M- $\beta$ -CD acceptor  |           |
| LP (1) O214          | $\sigma^*$ (1) C67-H150  | 1.15      |
| LP (2) O214          | $\sigma^*$ (1) C67-H150  | 0.62      |
| LP (1) O214          | $\sigma^*$ (1) C68-H153  | 1.17      |
| LP (2) O214          | $\sigma^*$ (1) C64-H145  | 0.55      |

**Table S2.** Topological parameters of the M- $\beta$ -CD@sarin complex calculated by AIM. All units are in a.u. except distance which is in Å

| Interaction | $\rho(r)$ | $\nabla^2\rho(r)$ | $\lambda_{(1)}$ | $\lambda_{(2)}$ | $\lambda_{(3)}$ | Distance |
|-------------|-----------|-------------------|-----------------|-----------------|-----------------|----------|
| O15...H226  | 0.0140    | 0.0474            | -0.0148         | -0.0126         | 0.0749          | 2.31     |
| O214...H145 | 0.0087    | 0.0284            | -0.0071         | -0.0069         | 0.0424          | 2.60     |
| O25...H223  | 0.0106    | 0.0357            | -0.0106         | -0.0098         | 0.0560          | 2.44     |
| O35...H221  | 0.0062    | 0.0239            | -0.0053         | -0.0048         | 0.0340          | 2.71     |
| O17...H226  | 0.0119    | 0.0375            | -0.0122         | -0.0115         | 0.0612          | 2.38     |
| O214...H153 | 0.0125    | 0.0428            | -0.0120         | -0.0116         | 0.0665          | 2.35     |
| O30...H220  | 0.0090    | 0.0297            | -0.0085         | -0.0079         | 0.0460          | 2.53     |
| O2...H221   | 0.0060    | 0.0215            | -0.0056         | -0.0055         | 0.0327          | 2.70     |
| O214...H150 | 0.0118    | 0.0390            | -0.0117         | -0.0114         | 0.0619          | 2.38     |

**Table S3.** Contributions to total energy calculated for the interaction energy (kcal mol<sup>-1</sup>)

| <b>M-<math>\beta</math>-CD@sarin</b> |          |
|--------------------------------------|----------|
| Total energy                         | 956.731  |
| Valence energy (diag. terms)         | 1127.139 |
| Bond                                 | 653.975  |
| Angle                                | 585.334  |
| Torsion                              | -112.170 |
| Inversion                            | 0.000    |
| Valence energy (cross terms)         | -70.231  |
| Stretch-Stretch                      | 0.530    |
| Stretch-Bend-Stretch                 | -12.874  |
| Stretch-Torsion-Stretch              | -0.162   |
| Separated-Stretch-Stretch            | 0.000    |
| Torsion-Stretch                      | -1.153   |
| Bend-Bend                            | -0.171   |
| Torsion-Bend-Bend                    | -26.309  |
| Bend-Torsion-Bend                    | -30.092  |
| Non-bond energy                      | -100.177 |
| van der Waals                        | -100.177 |
| Electrostatic                        | 0.000    |
| <b>M-<math>\beta</math>-CD</b>       |          |
| Total energy                         | 983.350  |
| Valence energy (diag. terms)         | 1122.397 |

|                              |          |
|------------------------------|----------|
| Bond                         | 649.365  |
| Angle                        | 579.655  |
| Torsion                      | -106.623 |
| Inversion                    | 0.000    |
| Valence energy (cross terms) | -69.267  |
| Stretch-Stretch              | 0.596    |
| Stretch-Bend-Stretch         | -12.647  |
| Stretch-Torsion-Stretch      | 0.224    |
| Separated-Stretch-Stretch    | 0.000    |
| Torsion-Stretch              | -1.076   |
| Bend-Bend                    | -0.173   |
| Torsion-Bend-Bend            | -25.990  |
| Bend-Torsion-Bend            | -30.202  |
| Non-bond energy              | -69.779  |
| van der Waals                | -69.779  |
| Electrostatic                | 0.000    |

**sarin**

|                              |          |
|------------------------------|----------|
| Total energy                 | 1033.892 |
| Valence energy (diag. terms) | 1054.256 |
| Bond                         | 612.367  |
| Angle                        | 447.436  |
| Torsion                      | -5.547   |
| Inversion                    | 0.000    |
| Valence energy (cross terms) | -10.702  |
| Stretch-Stretch              | 0.487    |
| Stretch-Bend-Stretch         | -10.518  |
| Stretch-Torsion-Stretch      | -0.386   |
| Separated-Stretch-Stretch    | 0.000    |
| Torsion-Stretch              | -0.077   |
| Bend-Bend                    | 0.002    |
| Torsion-Bend-Bend            | -0.319   |
| Bend-Torsion-Bend            | 0.110    |
| Non-bond energy              | -9.662   |
| van der Waals                | -9.662   |
| Electrostatic                | 0.000    |

---

XYZ coordinates of the optimized geometry of sarin:

0 1

|   |             |             |             |
|---|-------------|-------------|-------------|
| P | 1.10874900  | -0.19008700 | -0.09849700 |
| F | 1.12495100  | 1.20119900  | -0.85910800 |
| O | -0.39811400 | -0.67233800 | -0.28513600 |
| O | 2.09552500  | -1.14428200 | -0.60543900 |
| C | -1.55571900 | -0.05505100 | 0.32057900  |
| C | -1.78972900 | 1.33951300  | -0.23871900 |
| C | -2.71127100 | -0.99591700 | 0.03575500  |
| C | 1.30874900  | 0.35059800  | 1.60498100  |
| H | -1.38625100 | -0.00531300 | 1.40448900  |
| H | -2.72599000 | 1.74091700  | 0.15731300  |
| H | -0.98289100 | 2.02876400  | 0.01833800  |
| H | -1.86132300 | 1.28998100  | -1.32838100 |
| H | -3.62245600 | -0.62803400 | 0.51358600  |
| H | -2.49033600 | -1.99578500 | 0.41330100  |
| H | -2.87897200 | -1.05987700 | -1.04239300 |
| H | 2.32657900  | 0.72544400  | 1.72279300  |
| H | 0.60538400  | 1.14354700  | 1.86642800  |
| H | 1.16899600  | -0.50103100 | 2.27298800  |

XYZ coordinates of the optimized geometry of M- $\beta$ -CD:

0 1

|   |             |             |             |
|---|-------------|-------------|-------------|
| O | -6.25258100 | 0.49717000  | -0.85126700 |
| O | -5.91895300 | 0.87204000  | 2.72452300  |
| O | -5.76045700 | -1.93802800 | 2.37432400  |
| O | -6.69419400 | -1.88979000 | -2.67452100 |
| O | -4.45176700 | -2.63650300 | -0.09974800 |



|   |             |             |             |
|---|-------------|-------------|-------------|
| O | -3.27753700 | -3.14497200 | -2.02027100 |
| O | -5.31633700 | -5.28314200 | 0.12894500  |
| O | -2.72933700 | -6.53466000 | 0.20610100  |
| O | -0.70792700 | -1.33641300 | -2.18631900 |
| O | -0.60917100 | -4.68741000 | -0.07934500 |
| O | 1.17250500  | -5.56192700 | -1.27391000 |
| O | -0.10295700 | -6.43080800 | 2.00901800  |
| O | 2.60237700  | -5.61981500 | 2.57411100  |
| O | 2.45453900  | -3.40671600 | -3.09532600 |
| O | 3.53027900  | -3.62540200 | 0.75284100  |
| O | 5.51865200  | -3.24940400 | -0.38812600 |
| O | 4.78502900  | -3.20232400 | 3.13868700  |
| O | 5.74383300  | -0.58110400 | 2.67903900  |
| O | 7.06350500  | -1.40125000 | -2.21701100 |
| O | 5.02664200  | 0.37650800  | 0.00616500  |
| O | 4.57716000  | 1.35626100  | -2.03844800 |
| O | 7.05151500  | 2.28565000  | 0.47042300  |
| O | 5.31338100  | 4.59318400  | 0.36068100  |
| O | 1.55348300  | 1.15406700  | -2.93664000 |
| O | 2.63385800  | 3.86838900  | -0.26219800 |
| O | 1.47800700  | 5.47701900  | -1.45148500 |
| O | 2.77895000  | 5.50663000  | 1.92944000  |
| O | -0.02289300 | 5.96880400  | 2.32923600  |
| O | -1.19728100 | 6.42222400  | -2.56814200 |
| O | -1.66826400 | 4.81651500  | 0.36288700  |
| O | -3.30834400 | 4.61699100  | -1.27895500 |
| O | -3.52985700 | 5.91985100  | 2.12669300  |
| O | -5.58327700 | 3.91238200  | 1.98666700  |
| O | -2.66376500 | 2.37453400  | -3.11830800 |
| O | -4.74449200 | 1.72155100  | 0.39786300  |

|   |             |             |             |
|---|-------------|-------------|-------------|
| C | -6.02493800 | 1.17113300  | 0.36636600  |
| C | -6.20949200 | 0.19778800  | 1.52699200  |
| C | -5.34422100 | -1.04746700 | 1.36641700  |
| C | -5.47300100 | -1.65084200 | -0.03599000 |
| C | -5.32300700 | -0.55833900 | -1.10904700 |
| C | -6.77524200 | 0.55145800  | 3.80089400  |
| C | -4.85901700 | -2.97638900 | 2.71570900  |
| C | -5.59283400 | -1.01501300 | -2.54081200 |
| C | -7.95604100 | -1.27756200 | -2.49994600 |
| C | -4.38697100 | -3.47540300 | -1.22009000 |
| C | -4.27247900 | -4.93058400 | -0.74660900 |
| C | -2.95071100 | -5.16300900 | -0.02834500 |
| C | -1.78831900 | -4.64511800 | -0.86704300 |
| C | -2.03154900 | -3.20793700 | -1.32585100 |
| C | -6.58334300 | -5.35565900 | -0.48907600 |
| C | -3.11517700 | -6.97126300 | 1.49497100  |
| C | -0.95293600 | -2.72058600 | -2.28709300 |
| C | 0.13474100  | -1.01341000 | -1.09995000 |
| C | 0.19302500  | -5.81487900 | -0.29064100 |
| C | 0.87342900  | -6.21557200 | 1.01599800  |
| C | 1.86706200  | -5.15361600 | 1.46370100  |
| C | 2.83527900  | -4.79699300 | 0.34573900  |
| C | 2.07251400  | -4.50230600 | -0.95015700 |
| C | 2.29751200  | -4.94491700 | 3.77939400  |
| C | 2.98859700  | -4.31064200 | -2.14858700 |
| C | 1.69592200  | -4.03913800 | -4.10666900 |
| C | 4.92132000  | -3.67537100 | 0.81801200  |
| C | 5.40159900  | -2.77602500 | 1.95154300  |
| C | 5.10443100  | -1.30667500 | 1.65853300  |
| C | 5.58212800  | -0.90553300 | 0.25790200  |

|   |             |             |             |
|---|-------------|-------------|-------------|
| C | 5.12181400  | -1.93397300 | -0.78847800 |
| C | 5.60328700  | -3.13963500 | 4.28914700  |
| C | 5.28279700  | 0.73978200  | 2.90401900  |
| C | 5.68609800  | -1.71076800 | -2.18827000 |
| C | 7.92066300  | -2.48091200 | -1.90600800 |
| C | 5.55747300  | 1.12910400  | -1.05929300 |
| C | 6.07203700  | 2.46809200  | -0.52533300 |
| C | 4.92208000  | 3.27392900  | 0.05889900  |
| C | 3.77279600  | 3.36616500  | -0.93803000 |
| C | 3.40346800  | 2.01367200  | -1.55400000 |
| C | 8.30300900  | 1.86119400  | -0.02609400 |
| C | 5.73833900  | 4.78291000  | 1.69564400  |
| C | 2.46242300  | 2.20741600  | -2.74073400 |
| C | 2.16095600  | -0.05517000 | -3.34481100 |
| C | 2.39803800  | 5.24036500  | -0.41433900 |
| C | 1.86923300  | 5.81107400  | 0.89996500  |
| C | 0.48188700  | 5.26791800  | 1.21081400  |
| C | -0.44665700 | 5.44850600  | 0.01521600  |
| C | 0.19066400  | 4.87390300  | -1.25812200 |
| C | 2.95857300  | 6.54964800  | 2.86501900  |
| C | -0.65450500 | 5.14564700  | 3.29270200  |
| C | -0.61572300 | 5.13595300  | -2.52559600 |
| C | -0.28452000 | 7.46500700  | -2.82985800 |
| C | -2.85143600 | 5.34636000  | -0.17173500 |
| C | -3.93951200 | 5.33327600  | 0.91575200  |
| C | -4.38493800 | 3.91149100  | 1.24501900  |
| C | -4.64188600 | 3.08037000  | -0.00433500 |
| C | -3.51482200 | 3.23232500  | -1.01926100 |
| C | -3.08536300 | 7.25348900  | 2.00801100  |
| C | -5.40430400 | 3.82185300  | 3.38569600  |

|   |             |             |             |
|---|-------------|-------------|-------------|
| C | -3.83072100 | 2.59769800  | -2.36482600 |
| C | -2.04081000 | 1.14717200  | -2.79823900 |
| H | -6.78095900 | 1.95960600  | 0.43036600  |
| H | -7.26354600 | -0.12207700 | 1.50568000  |
| H | -4.29082500 | -0.75882800 | 1.51497800  |
| H | -6.46191400 | -2.12402700 | -0.12991600 |
| H | -4.29378700 | -0.17178500 | -1.05706000 |
| H | -6.45148700 | 1.15842100  | 4.64928200  |
| H | -7.81812300 | 0.80664300  | 3.56451100  |
| H | -6.71443800 | -0.50928500 | 4.05908200  |
| H | -5.10478300 | -3.28031400 | 3.73633400  |
| H | -4.95668000 | -3.83111100 | 2.04023200  |
| H | -3.82105000 | -2.61896300 | 2.69101300  |
| H | -5.74530200 | -0.11242500 | -3.15119600 |
| H | -4.72082800 | -1.54962900 | -2.92364600 |
| H | -8.70528100 | -1.99736000 | -2.83511900 |
| H | -8.14326000 | -1.01054200 | -1.45402600 |
| H | -8.03450100 | -0.36365100 | -3.10270300 |
| H | -5.26690300 | -3.35136800 | -1.85557500 |
| H | -4.29442800 | -5.57347700 | -1.64255400 |
| H | -2.95222500 | -4.60191700 | 0.91863100  |
| H | -1.67281800 | -5.28082400 | -1.75926800 |
| H | -2.06877000 | -2.55599700 | -0.44327900 |
| H | -7.28065400 | -5.73506100 | 0.25861900  |
| H | -6.93479200 | -4.37455000 | -0.83531200 |
| H | -6.56428800 | -6.04213500 | -1.34651500 |
| H | -2.81927100 | -8.02012600 | 1.57197900  |
| H | -2.58722200 | -6.39850100 | 2.26705600  |
| H | -4.19693000 | -6.88213800 | 1.63528100  |
| H | -0.02475900 | -3.28223700 | -2.12069200 |

|   |             |             |             |
|---|-------------|-------------|-------------|
| H | -1.30044600 | -2.91415400 | -3.30709500 |
| H | 0.28539500  | 0.06700000  | -1.12395200 |
| H | -0.30163300 | -1.31220200 | -0.13663200 |
| H | 1.11055400  | -1.50727500 | -1.21199000 |
| H | -0.41091900 | -6.64587000 | -0.66347800 |
| H | 1.42751400  | -7.14455700 | 0.81158600  |
| H | 1.30403900  | -4.24457300 | 1.71984700  |
| H | 3.53909500  | -5.62982600 | 0.19625100  |
| H | 1.51464100  | -3.57282300 | -0.78075800 |
| H | 2.91736400  | -5.39594600 | 4.55771300  |
| H | 2.54530400  | -3.88126900 | 3.70023200  |
| H | 1.23867700  | -5.06976900 | 4.04167600  |
| H | 3.94343500  | -3.90760800 | -1.81034100 |
| H | 3.17729700  | -5.29478100 | -2.60193300 |
| H | 1.24892100  | -3.24964400 | -4.71452200 |
| H | 2.33746200  | -4.66339300 | -4.74370300 |
| H | 0.90243500  | -4.66745100 | -3.68472600 |
| H | 5.26309700  | -4.70293800 | 0.98317100  |
| H | 6.49488800  | -2.89491500 | 2.01507400  |
| H | 4.01310000  | -1.15906200 | 1.70164100  |
| H | 6.68096700  | -0.85129000 | 0.26430200  |
| H | 4.02327200  | -1.88444300 | -0.85304600 |
| H | 5.00674900  | -3.53019700 | 5.11628500  |
| H | 6.49639500  | -3.76915000 | 4.17111700  |
| H | 5.91264100  | -2.11396500 | 4.50529700  |
| H | 5.48781000  | 0.97146500  | 3.95243000  |
| H | 5.80378100  | 1.45284100  | 2.26060600  |
| H | 4.20207800  | 0.81550400  | 2.72781100  |
| H | 5.48000400  | -2.60988000 | -2.78753700 |
| H | 5.16925100  | -0.86742000 | -2.65364900 |

|   |             |             |             |
|---|-------------|-------------|-------------|
| H | 8.92773100  | -2.17957500 | -2.20051500 |
| H | 7.90652000  | -2.72305500 | -0.83762700 |
| H | 7.63366200  | -3.38228500 | -2.46282300 |
| H | 6.36164700  | 0.58241700  | -1.55728800 |
| H | 6.49338500  | 3.02954600  | -1.37549900 |
| H | 4.54029800  | 2.76648700  | 0.95638600  |
| H | 4.06876300  | 4.04963300  | -1.74983100 |
| H | 2.91195200  | 1.39539400  | -0.79009200 |
| H | 8.98675400  | 1.82782800  | 0.82287500  |
| H | 8.25475200  | 0.86222900  | -0.48044300 |
| H | 8.68915200  | 2.56698700  | -0.77365200 |
| H | 5.87060100  | 5.85866800  | 1.83314300  |
| H | 4.97061600  | 4.43120000  | 2.39578400  |
| H | 6.68348500  | 4.26594900  | 1.88950100  |
| H | 1.86384300  | 3.10692500  | -2.57180100 |
| H | 3.08465300  | 2.36415200  | -3.63676500 |
| H | 1.35418800  | -0.76711600 | -3.52751800 |
| H | 2.75331900  | 0.09136300  | -4.25929600 |
| H | 2.82241800  | -0.46231600 | -2.56904400 |
| H | 3.32175400  | 5.75476300  | -0.69299400 |
| H | 1.78699100  | 6.90141100  | 0.76496100  |
| H | 0.57629500  | 4.19498800  | 1.43396700  |
| H | -0.61556600 | 6.52566200  | -0.13365100 |
| H | 0.30831000  | 3.78649400  | -1.13233100 |
| H | 3.67155300  | 6.18779100  | 3.60922900  |
| H | 3.37819700  | 7.44440200  | 2.38304400  |
| H | 2.01673400  | 6.81524100  | 3.35400500  |
| H | -1.01549100 | 5.80764700  | 4.08302900  |
| H | -1.50664600 | 4.61392000  | 2.86158500  |
| H | 0.06346600  | 4.43323700  | 3.72119600  |

|   |             |             |             |
|---|-------------|-------------|-------------|
| H | 0.05782500  | 4.98845300  | -3.38372200 |
| H | -1.43653100 | 4.42230700  | -2.59779100 |
| H | -0.87401600 | 8.35970900  | -3.04110700 |
| H | 0.38223100  | 7.65892000  | -1.98067300 |
| H | 0.34150400  | 7.23149600  | -3.70177300 |
| H | -2.67268000 | 6.35572000  | -0.55650100 |
| H | -4.80496300 | 5.87819400  | 0.50194600  |
| H | -3.57879000 | 3.41573000  | 1.80746600  |
| H | -5.58213900 | 3.41567700  | -0.46739700 |
| H | -2.59958900 | 2.78894900  | -0.60278800 |
| H | -3.04991100 | 7.66838900  | 3.01719200  |
| H | -2.07697200 | 7.30160400  | 1.57928300  |
| H | -3.77917500 | 7.85322900  | 1.40196000  |
| H | -6.40317600 | 3.76259400  | 3.82456600  |
| H | -4.85238900 | 2.90965400  | 3.64295100  |
| H | -4.88175400 | 4.70073900  | 3.77643200  |
| H | -4.39553500 | 1.66743500  | -2.21539900 |
| H | -4.45813000 | 3.29743400  | -2.92654800 |
| H | -1.05567600 | 1.12894600  | -3.26717700 |
| H | -1.90768900 | 1.02403900  | -1.71370000 |
| H | -2.63331800 | 0.29462600  | -3.15935100 |
| C | 0.13631000  | -7.57522900 | 2.80163500  |
| H | -0.65500100 | -7.61223200 | 3.55342100  |
| H | 0.09219700  | -8.49193800 | 2.19696200  |
| H | 1.11225900  | -7.52183000 | 3.29674200  |

XYZ coordinates of the optimized geometry of M- $\beta$ -CD@sarin complex:

0 1

|   |             |             |             |
|---|-------------|-------------|-------------|
| O | -0.57690200 | -6.15519200 | -0.56727500 |
| O | -1.09620400 | -4.86019400 | 2.74553600  |

|   |             |             |             |
|---|-------------|-------------|-------------|
| O | 1.81622500  | -5.09717400 | 2.50052700  |
| O | 1.75194400  | -6.94408700 | -2.32475700 |
| O | 2.61149100  | -4.35209200 | -0.16273000 |
| O | 3.17494300  | -3.49635500 | -2.22363400 |
| O | 5.17584500  | -5.40896400 | 0.15831600  |
| O | 6.67128000  | -2.94642100 | -0.20669800 |
| O | 1.52171500  | -0.93106900 | -2.75846100 |
| O | 4.93867300  | -0.75573200 | -0.58642600 |
| O | 5.60502100  | 1.00007800  | -1.93756300 |
| O | 7.03014000  | -0.16097100 | 1.18764800  |
| O | 6.06695300  | 2.47656900  | 1.87916600  |
| O | 3.24605200  | 2.21556600  | -3.50355500 |
| O | 3.74455400  | 3.17465500  | 0.31474900  |
| O | 3.29872000  | 5.29358500  | -0.48622200 |
| O | 3.25850900  | 3.89925100  | 2.82507400  |
| O | 0.71851400  | 5.36643000  | 2.59026400  |
| O | 1.45622800  | 7.00377000  | -2.17811000 |
| O | -0.33016200 | 4.80740200  | -0.13323900 |
| O | -1.32608400 | 4.49547800  | -2.19267800 |
| O | -2.16871100 | 6.90130100  | 0.41247600  |
| O | -4.52761700 | 5.24032600  | 0.25477300  |
| O | -1.22090900 | 1.54203400  | -3.25652100 |
| O | -3.94143300 | 2.58472000  | -0.51590900 |
| O | -5.53594000 | 1.51474200  | -1.79869300 |
| O | -5.67313900 | 2.74266900  | 1.60935600  |
| O | -6.33447300 | -0.03971900 | 1.89507000  |
| O | -6.48289000 | -1.13322400 | -3.01148100 |
| O | -5.04928900 | -1.66820000 | -0.00974100 |
| O | -4.75967000 | -3.30614600 | -1.64085900 |
| O | -6.26577600 | -3.53750000 | 1.68082800  |



|   |             |             |             |
|---|-------------|-------------|-------------|
| O | -4.07611700 | -5.37868300 | 1.79344000  |
| O | -2.40575100 | -2.73046600 | -3.41182700 |
| O | -1.86956500 | -4.42784500 | 0.24060100  |
| C | -1.28613900 | -5.66044900 | 0.54324900  |
| C | -0.35703400 | -5.51754700 | 1.74872900  |
| C | 0.96059400  | -4.81583100 | 1.41749500  |
| C | 1.56087700  | -5.27524400 | 0.08181000  |
| C | 0.47523000  | -5.29308800 | -1.00470100 |
| C | -0.58691900 | -4.94936700 | 4.06231000  |
| C | 2.93387200  | -4.24431300 | 2.67262400  |
| C | 0.90913400  | -5.81173300 | -2.37197900 |
| C | 1.10680600  | -8.14665300 | -1.95363300 |
| C | 3.43077700  | -4.51606400 | -1.28788100 |
| C | 4.90127400  | -4.46920800 | -0.85336300 |
| C | 5.27571100  | -3.09061500 | -0.33069100 |
| C | 4.79877400  | -1.99191800 | -1.27176500 |
| C | 3.33813100  | -2.18611500 | -1.68337800 |
| C | 5.12949900  | -6.75094900 | -0.27922500 |
| C | 7.17005700  | -3.21662200 | 1.08902200  |
| C | 2.90867700  | -1.19369000 | -2.75641000 |
| C | 1.13959400  | -0.05676100 | -1.71957200 |
| C | 6.01469000  | 0.04600800  | -0.98090300 |
| C | 6.58671100  | 0.77588000  | 0.23366100  |
| C | 5.53141400  | 1.68979800  | 0.83788000  |
| C | 4.94062600  | 2.61807600  | -0.21273300 |
| C | 4.55601200  | 1.85120400  | -1.48061400 |
| C | 5.73280800  | 2.01075000  | 3.17362300  |
| C | 4.19224600  | 2.78496000  | -2.62300300 |
| C | 3.82983900  | 1.55555300  | -4.60998600 |
| C | 3.74192400  | 4.53772200  | 0.61632300  |

|   |             |             |             |
|---|-------------|-------------|-------------|
| C | 2.84444500  | 4.79517000  | 1.82628100  |
| C | 1.34453700  | 4.70204500  | 1.52176700  |
| C | 0.96404600  | 5.31706600  | 0.16605800  |
| C | 1.98158300  | 4.94318600  | -0.92021200 |
| C | 2.85221400  | 4.21505300  | 4.15030600  |
| C | -0.65073100 | 5.05901600  | 2.81279200  |
| C | 1.76932600  | 5.63026000  | -2.26699800 |
| C | 2.53036400  | 7.83092400  | -1.77641200 |
| C | -1.06322100 | 5.42044200  | -1.16691200 |
| C | -2.38260600 | 5.96080800  | -0.61225300 |
| C | -3.22497000 | 4.81689700  | -0.07052500 |
| C | -3.36538300 | 3.72737400  | -1.12683300 |
| C | -2.02821800 | 3.32824300  | -1.76057300 |
| C | -1.69621600 | 8.15137900  | -0.04364700 |
| C | -4.69430600 | 5.60583600  | 1.61077600  |
| C | -2.25997500 | 2.44969200  | -2.98625500 |
| C | -0.01875800 | 2.15511200  | -3.67940300 |
| C | -5.31361900 | 2.40819200  | -0.73303900 |
| C | -5.97621700 | 1.88168400  | 0.53942200  |
| C | -5.52913100 | 0.46100600  | 0.84729000  |
| C | -5.65097600 | -0.43741700 | -0.37617600 |
| C | -4.98520900 | 0.20693900  | -1.59837000 |
| C | -6.75281200 | 2.96608200  | 2.49324900  |
| C | -5.60763100 | -0.67086500 | 2.93273200  |
| C | -5.19185900 | -0.57520900 | -2.89229500 |
| C | -7.49256000 | -0.19619200 | -3.31676200 |
| C | -5.54833500 | -2.85187400 | -0.57316600 |
| C | -5.56407000 | -3.92634400 | 0.52570200  |
| C | -4.13809700 | -4.23893600 | 0.96776100  |
| C | -3.21291900 | -4.49555100 | -0.21550900 |

|   |             |             |             |
|---|-------------|-------------|-------------|
| C | -3.38327100 | -3.45693100 | -1.31787300 |
| C | -7.59726000 | -3.12939200 | 1.45391100  |
| C | -4.15519200 | -5.10717000 | 3.17928600  |
| C | -2.67981000 | -3.85157500 | -2.60772100 |
| C | -1.18314200 | -2.11183400 | -3.06991700 |
| H | -2.05946400 | -6.39800900 | 0.77109600  |
| H | -0.09480200 | -6.53790100 | 2.07512600  |
| H | 0.77419700  | -3.73014600 | 1.34044100  |
| H | 1.96694300  | -6.29053800 | 0.20317300  |
| H | 0.09281400  | -4.26888700 | -1.13305800 |
| H | -1.41780200 | -4.71104600 | 4.73100000  |
| H | -0.22345100 | -5.96147500 | 4.27939800  |
| H | 0.23205200  | -4.24482500 | 4.23169000  |
| H | 3.22572000  | -4.32173700 | 3.72281000  |
| H | 3.76860700  | -4.54378400 | 2.03188600  |
| H | 2.66954300  | -3.20024300 | 2.45419300  |
| H | -0.00413200 | -6.03877800 | -2.94182000 |
| H | 1.46088700  | -5.03004000 | -2.89996000 |
| H | 1.80757700  | -8.95701800 | -2.16308600 |
| H | 0.83511800  | -8.15728100 | -0.89292200 |
| H | 0.19221800  | -8.29679500 | -2.54149200 |
| H | 3.22419800  | -5.45932100 | -1.79565600 |
| H | 5.51586300  | -4.67646300 | -1.74526000 |
| H | 4.77821700  | -2.93132100 | 0.63837900  |
| H | 5.42426400  | -1.99945400 | -2.17751400 |
| H | 2.70928500  | -2.07683700 | -0.79029800 |
| H | 5.44463100  | -7.37008500 | 0.56134600  |
| H | 4.11952800  | -7.05477200 | -0.58558000 |
| H | 5.81330700  | -6.91301100 | -1.12352200 |
| H | 8.24377300  | -3.01790600 | 1.05754000  |

|   |             |             |             |
|---|-------------|-------------|-------------|
| H | 6.70959900  | -2.54602300 | 1.82465600  |
| H | 6.99610800  | -4.25979600 | 1.37064600  |
| H | 3.47010800  | -0.25903100 | -2.63510100 |
| H | 3.15358300  | -1.62556300 | -3.73213900 |
| H | 0.07007500  | 0.13887100  | -1.82938400 |
| H | 1.33457400  | -0.49467200 | -0.73034200 |
| H | 1.68047100  | 0.89748000  | -1.79890000 |
| H | 6.79210200  | -0.56087100 | -1.45388600 |
| H | 7.42664900  | 1.38689700  | -0.12966300 |
| H | 4.72222400  | 1.05044600  | 1.21448000  |
| H | 5.66700600  | 3.41139800  | -0.44627700 |
| H | 3.67557700  | 1.25088200  | -1.21795300 |
| H | 6.14974600  | 2.72718700  | 3.88417400  |
| H | 4.64529700  | 1.97584300  | 3.30566800  |
| H | 6.15705700  | 1.01668300  | 3.35968600  |
| H | 3.75495000  | 3.69295700  | -2.20463200 |
| H | 5.11351100  | 3.06496600  | -3.15448100 |
| H | 3.02341500  | 1.04366800  | -5.13938800 |
| H | 4.30577800  | 2.27696100  | -5.28790800 |
| H | 4.57929000  | 0.82131900  | -4.29253900 |
| H | 4.75911000  | 4.87737900  | 0.83596500  |
| H | 3.03182700  | 5.83489700  | 2.14278100  |
| H | 1.05149600  | 3.63994900  | 1.50632400  |
| H | 0.92773800  | 6.41049600  | 0.27738800  |
| H | 1.92128200  | 3.85460500  | -1.08037700 |
| H | 3.49445000  | 3.62528700  | 4.81010500  |
| H | 3.00338900  | 5.28188800  | 4.35672400  |
| H | 1.80703000  | 3.95188300  | 4.31843200  |
| H | -0.85503400 | 5.31098800  | 3.85635500  |
| H | -1.29632400 | 5.64988700  | 2.15746300  |

|   |             |             |             |
|---|-------------|-------------|-------------|
| H | -0.83539000 | 3.98839700  | 2.67522100  |
| H | 2.67810800  | 5.48611600  | -2.86970200 |
| H | 0.93519800  | 5.15312900  | -2.78877200 |
| H | 2.22235800  | 8.86077700  | -1.96610000 |
| H | 2.76991000  | 7.70692800  | -0.71497300 |
| H | 3.43399400  | 7.60880900  | -2.35868100 |
| H | -0.49185700 | 6.22910300  | -1.62553600 |
| H | -2.92949900 | 6.42832600  | -1.44810400 |
| H | -2.72393600 | 4.37627100  | 0.80476400  |
| H | -4.02504100 | 4.10245500  | -1.92545600 |
| H | -1.42749200 | 2.77867800  | -1.02273000 |
| H | -1.64315500 | 8.80633200  | 0.82667600  |
| H | -0.69733000 | 8.08050500  | -0.49524000 |
| H | -2.38409900 | 8.58566100  | -0.78159200 |
| H | -5.75978500 | 5.80006300  | 1.75420500  |
| H | -4.39367500 | 4.78188500  | 2.26960900  |
| H | -4.11837100 | 6.50440000  | 1.85298700  |
| H | -3.16096500 | 1.85153200  | -2.82439600 |
| H | -2.43339900 | 3.11607400  | -3.84662400 |
| H | 0.66518500  | 1.35372200  | -3.96577400 |
| H | -0.19773700 | 2.82058100  | -4.53543400 |
| H | 0.44589900  | 2.74263500  | -2.87692500 |
| H | -5.77461400 | 3.35733000  | -1.01950600 |
| H | -7.06087200 | 1.86452700  | 0.34716600  |
| H | -4.47363900 | 0.49779900  | 1.15590200  |
| H | -6.71760200 | -0.59345200 | -0.59426100 |
| H | -3.90289700 | 0.28760300  | -1.40589200 |
| H | -6.38252900 | 3.62149600  | 3.28434300  |
| H | -7.58510500 | 3.46868700  | 1.98013100  |
| H | -7.11410700 | 2.02967700  | 2.92874300  |

|   |             |             |             |
|---|-------------|-------------|-------------|
| H | -6.33885600 | -0.99759900 | 3.67556500  |
| H | -5.06601600 | -1.54618800 | 2.56147800  |
| H | -4.91053300 | 0.03756400  | 3.40228400  |
| H | -4.98561800 | 0.10701500  | -3.73109700 |
| H | -4.49019300 | -1.40886100 | -2.93910600 |
| H | -8.38948500 | -0.76476000 | -3.57058300 |
| H | -7.70944900 | 0.47195300  | -2.47425100 |
| H | -7.20522800 | 0.42638100  | -4.17484100 |
| H | -6.53886700 | -2.67919800 | -1.00616000 |
| H | -6.01651600 | -4.83182800 | 0.08774800  |
| H | -3.75024600 | -3.36013500 | 1.50309200  |
| H | -3.42739500 | -5.49382900 | -0.62789000 |
| H | -2.97578600 | -2.50155800 | -0.95859400 |
| H | -8.09696400 | -3.12142100 | 2.42436000  |
| H | -7.63738000 | -2.11589600 | 1.03600800  |
| H | -8.12342600 | -3.82945500 | 0.78977600  |
| H | -3.86186900 | -6.02338300 | 3.69677800  |
| H | -3.45342400 | -4.30943600 | 3.45349200  |
| H | -5.16989800 | -4.82115500 | 3.47120600  |
| H | -1.76013300 | -4.40646300 | -2.37094100 |
| H | -3.34959900 | -4.50917500 | -3.17091700 |
| H | -1.12276500 | -1.15979700 | -3.60059800 |
| H | -1.11579900 | -1.91231800 | -1.98839500 |
| H | -0.32625200 | -2.73918600 | -3.34975300 |
| C | 8.28943900  | 0.15155900  | 1.74556400  |
| H | 8.49706400  | -0.60468100 | 2.50549800  |
| H | 9.08060300  | 0.11594400  | 0.98424900  |
| H | 8.28529100  | 1.14507800  | 2.20933400  |
| P | 0.90298900  | 0.89503200  | 3.07557900  |
| F | 1.78158000  | 0.13346500  | 4.14023200  |

|   |             |             |            |
|---|-------------|-------------|------------|
| O | -0.16020000 | -0.26036600 | 2.79692900 |
| O | 0.38669700  | 2.18422200  | 3.56682800 |
| C | -1.02010200 | -0.23764700 | 1.62643800 |
| C | -2.04018700 | -1.33742000 | 1.84584000 |
| C | -1.67269600 | 1.12054600  | 1.41088700 |
| C | 1.99119500  | 0.99985400  | 1.65997500 |
| H | -0.38947500 | -0.48601100 | 0.76150400 |
| H | -2.75188100 | -1.35720600 | 1.01303800 |
| H | -1.56953900 | -2.32126200 | 1.93308700 |
| H | -2.59821100 | -1.13032000 | 2.76490200 |
| H | -2.32799400 | 1.07520700  | 0.53611400 |
| H | -0.94389100 | 1.92091300  | 1.23782700 |
| H | -2.27403800 | 1.40320100  | 2.28128500 |
| H | 2.73092000  | 1.77857900  | 1.86482900 |
| H | 2.47422600  | 0.04202100  | 1.44748300 |
| H | 1.42228300  | 1.32342500  | 0.78251700 |
